# Supplementary material for: Biophysical attributes that affect CaMKII activation deduced with a novel spatial stochastic simulation approach
Source: PubMed Central journal article supplement (PMC5814094; doi:10.1371/journal.pcbi.1005946), 2018-02-05
Supplement: pcbi.1005946.s011.pdf [file pcbi.1005946.s011.pdf]

Table S1. Kinetic parameters of all reactions

| reaction name | on                          |                                 | off                             |                  |                 |                                | kD        |
|---------------|-----------------------------|---------------------------------|---------------------------------|------------------|-----------------|--------------------------------|-----------|
|               | $\text{nm}^3\text{ms}^{-1}$ | $\mu\text{M}^{-1}\text{s}^{-1}$ | $\mu\text{M}^{-1}\text{s}^{-1}$ | $\text{ms}^{-1}$ | $\text{s}^{-1}$ | $\text{s}^{-1}$                |           |
| N1~ca         | 161500                      | 95                              | adapted [21], [20]              | 3.75             | 3,750.00        | adapted [21], [20]             | 39.47368  |
| N2~ca         | 161500                      | 95                              | adapted [21], [20]              | 0.75             | 750             | adapted [21], [20]             | 7.89474   |
| C1~ca         | 8548.5714                   | 5.02857                         | adapted [21], [20]              | 0.0528           | 52.8            | adapted [21], [20]             | 10.50000  |
| C2~ca         | 8548.5714                   | 5.02857                         | adapted [21], [20]              | 0.00784          | 7.84            | adapted [21], [20]             | 1.55909   |
| KN1~ca        | 129200                      | <b>76</b>                       | [21]                            | 0.3              | <b>300</b>      | [21]                           | 3.94737   |
| KN2~ca        | 129200                      | <b>76</b>                       | [21]                            | 0.06             | <b>60</b>       | [21]                           | 0.78947   |
| KC1~ca        | 74800                       | <b>44</b>                       | [21]                            | 0.033            | <b>33</b>       | [21]                           | 0.75000   |
| KC2~ca        | 74800                       | <b>44</b>                       | [21]                            | 0.0049           | <b>4.9</b>      | [21]                           | 0.11136   |
| KpN1~ca       | 129200                      | 76                              | adapted [21], [20]              | 0.06             | 60              | microscopic reversibility      | 0.78947   |
| KpN2~ca       | 129200                      | 76                              | adapted [21], [20]              | 0.03             | 30              | microscopic reversibility      | 0.39474   |
| KpC1~ca       | 74800                       | 44                              | adapted [21], [20]              | 0.0066           | 6.6             | microscopic reversibility      | 0.15000   |
| KpC2~ca       | 74800                       | 44                              | adapted [21], [20]              | 0.00245          | 2.45            | microscopic reversibility      | 0.05568   |
| K~N0C0        | 32.3                        | 0.019                           | [21]                            | 0.005586         | <b>5.586</b>    | [21]                           | 294       |
| K~N0C1        | 501.5                       | 0.295                           | [21]                            | 0.006195         | <b>6.195</b>    | [21]                           | 21        |
| K~N0C2        | 7820                        | 4.6                             | [21]                            | 0.0069           | <b>6.9</b>      | [21]                           | 1.5       |
| K~N1C0        | 187                         | 0.11                            | [21]                            | 0.003234         | <b>3.234</b>    | [21]                           | 29.4      |
| K~N1C1        | 2805                        | 1.65                            | [21]                            | 0.003465         | <b>3.465</b>    | [21]                           | 2.1       |
| K~N1C2        | 44200                       | 26                              | [21]                            | 0.0039           | <b>3.9</b>      | [21]                           | 0.15      |
| K~N2C0        | 1020                        | 0.6                             | [21]                            | 0.001764         | <b>1.764</b>    | [21]                           | 2.94      |
| K~N2C1        | 16150                       | 9.5                             | [21]                            | 0.001995         | <b>1.995</b>    | [21]                           | 0.21      |
| K~N2C2        | 131750                      | 77.5                            | [21]                            | 0.0011625        | <b>1.1625</b>   | [21]                           | 0.015     |
| Kp~N0C0       | 32.3                        | 0.019                           | adapted [21], [20]              | 0.00016758       | 0.16758         | microscopic reversibility      | 8.82      |
| Kp~N0C1       | 501.5                       | 0.295                           | adapted [21], [20]              | 0.00003717       | 0.03717         | microscopic reversibility      | 0.126     |
| Kp~N0C2       | 7820                        | 4.6                             | adapted [21], [20]              | 0.0000207        | 0.0207          | microscopic reversibility      | 0.0045    |
| Kp~N1C0       | 187                         | 0.11                            | adapted [21], [20]              | 0.000019404      | 0.019404        | microscopic reversibility      | 0.1764    |
| Kp~N1C1       | 2805                        | 1.65                            | adapted [21], [20]              | 0.000004158      | 0.004158        | microscopic reversibility      | 0.00252   |
| Kp~N1C2       | 44200                       | 26                              | adapted [21], [20]              | 0.00000234       | 0.00234         | microscopic reversibility      | 0.00009   |
| Kp~N2C0       | 1020                        | 0.6                             | adapted [21], [20]              | 0.000005292      | 0.005292        | microscopic reversibility      | 0.00882   |
| Kp~N2C1       | 16150                       | 9.5                             | adapted [21], [20]              | 0.000001197      | 0.001197        | microscopic reversibility      | 0.000126  |
| Kp~N2C2       | 131750                      | 77.5                            | adapted [21], [20]              | 0.00000034875    | 0.00034875      | microscopic reversibility      | 0.0000045 |
| KN0C0~p       |                             |                                 |                                 | 0                | 0               | [21]                           |           |
| KN0C1~p       |                             |                                 |                                 | 0.0005           | 0.5             | microscopic reversibility      |           |
| KN0C2~p       |                             |                                 |                                 | 0.001            | 1               | microscopic reversibility      |           |
| KN1C0~p       |                             |                                 |                                 | 0.0005           | 0.5             | microscopic reversibility      |           |
| KN1C1~p       |                             |                                 |                                 | 0.0025           | 2.5             | microscopic reversibility      |           |
| KN1C2~p       |                             |                                 |                                 | 0.005            | 5               | microscopic reversibility      |           |
| KN2C0~p       |                             |                                 |                                 | 0.001            | 1               | microscopic reversibility      |           |
| KN2C1~p       |                             |                                 |                                 | 0.005            | 5               | adapted [21], [20]             |           |
| KN2C2~p       |                             |                                 |                                 | 0.01             | 10              | adapted [21], [20], [19], [12] |           |
| KpNxCy_dephos |                             |                                 |                                 | 0.000003         | 0.003           | [20]                           |           |
| Kp_dephos     |                             |                                 |                                 | 0.000003         | 0.003           | [20]                           |           |

Remarks: The **bold italic** parameters are directly from ref [21]. The remaining parameters are either derived or adapted from both references or constrained with microscopic reversibility.
